# Supplementary material
Source: PubMed Central journal article supplement (PMC4403202)
Supplement: pnas.201423204SI.pdf [file pnas.201423204SI.pdf]

# Supporting Information

Liu et al. 10.1073/pnas.1423204112

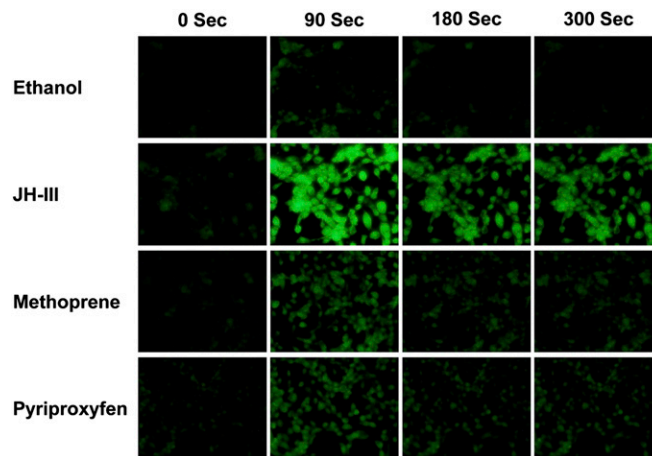

**Fig. S1.** JH-induced increase in intracellular calcium concentration in Aag2 cells. The calcium indicator Fluo-8 AM was added to the culture medium 45 min before Aag2 cells were stimulated with the indicated chemicals (1  $\mu$ M) or ethanol (0.1%). Images were captured at 0, 90, 180, and 300 s after the treatments. The experiment was performed three times with similar results.

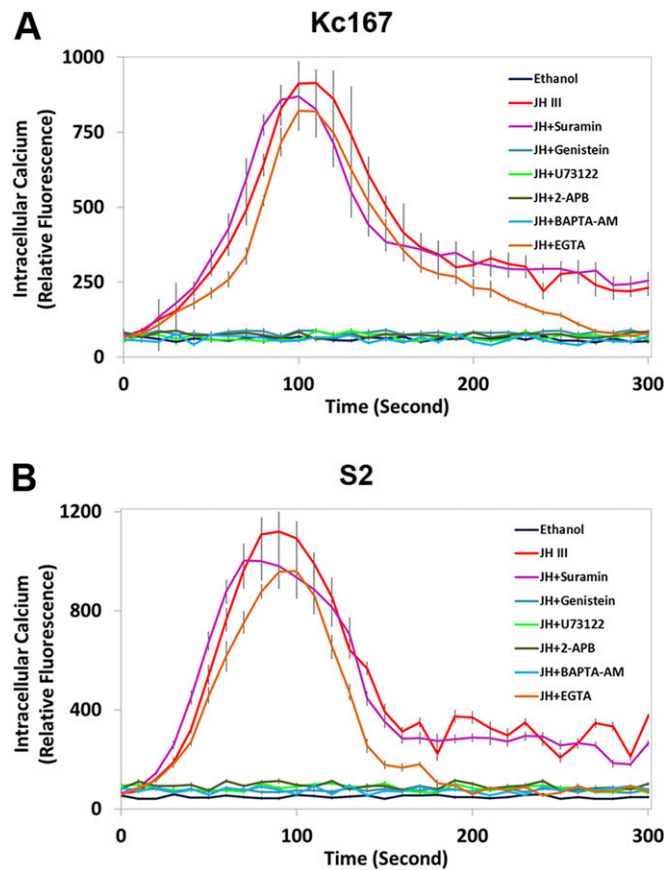

**Fig. S2.** The JH-induced increase in intracellular calcium requires the function of PLC in *Drosophila* Kc167 (A) and S2 (B) cells. Cells were treated with 1  $\mu$ M of JH-III and the indicated chemicals that blocked the PLC-Ca<sup>2+</sup> signaling pathway. Ethanol was used as a negative control. Intracellular calcium was measured using the fluorescent calcium marker Fluo-8 AM. Results are the mean  $\pm$  SD of three independent experiments.

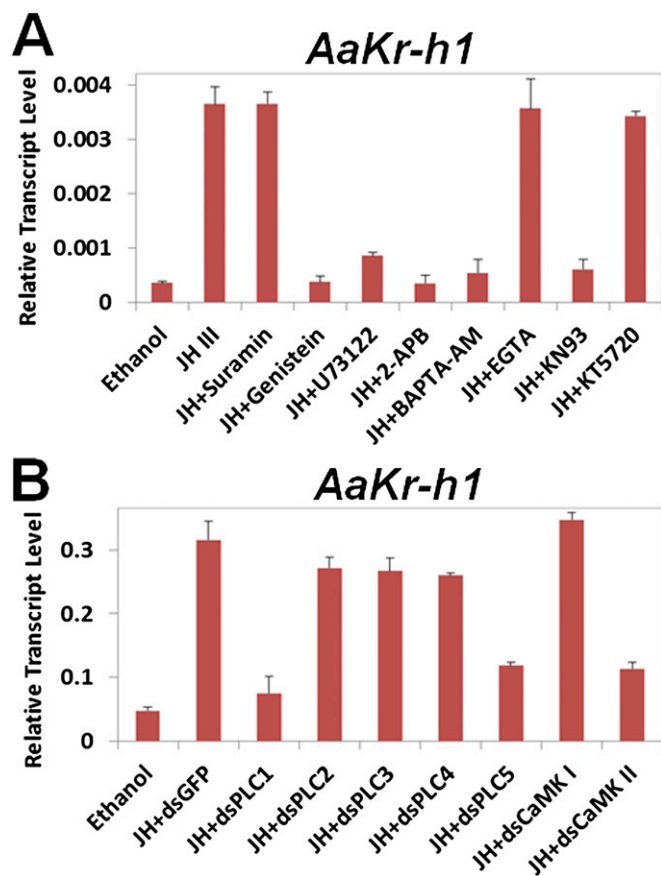

**Fig. S3.** Disruption of the PLC/Ca<sup>2+</sup>/CaMKII pathway represses the JH-induced expression of *AaKr-h1* in Aag2 cells. (A) After cells were preincubated with the indicated inhibitors for 45 min, 1  $\mu$ M JH-III was added to the culture medium. The cells were collected for RNA extraction 1 h after the addition of JH. The mRNA levels of *AaKr-h1* were determined by using real-time PCR. Results are the mean  $\pm$  SD of three independent experiments. (B) Aag2 cells were transfected with dsRNAs against GFP (a negative control), individual PLC isoforms, CaMKI, or CaMKII. Two days after the transfection, cells were treated with 1  $\mu$ M JH-III for 1 h. The mRNA transcripts of *AaKr-h1* were analyzed by real-time PCR. Results are the mean  $\pm$  SD of three independent experiments.

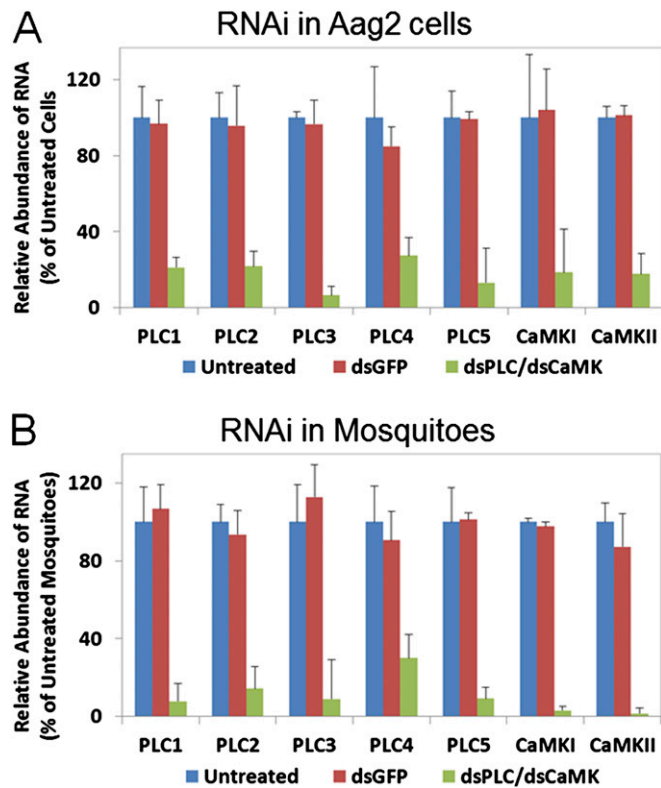

**Fig. 54.** RNAi-mediated knockdown of PLC isoforms and CaMKII. (A) DsRNAs for GFP, individual PLC isoforms, CaMKI, and CaMKII were added to the cultured Aag2 cells. Cells were collected 48 h after the addition of dsRNA. RNAi efficiency was assessed by real-time PCR. The amount of the dsRNA-targeted transcript in the untreated cells was set as 100%. Results are the mean  $\pm$  SD of at least three independent experiments. (B) DsRNAs were injected into newly emerged female mosquitoes. RNAi efficiency was evaluated 72 h after injection. The amount of the dsRNA-targeted transcript in the untreated mosquitoes was set as 100%. Results are the mean  $\pm$  SD of at least three independent experiments.

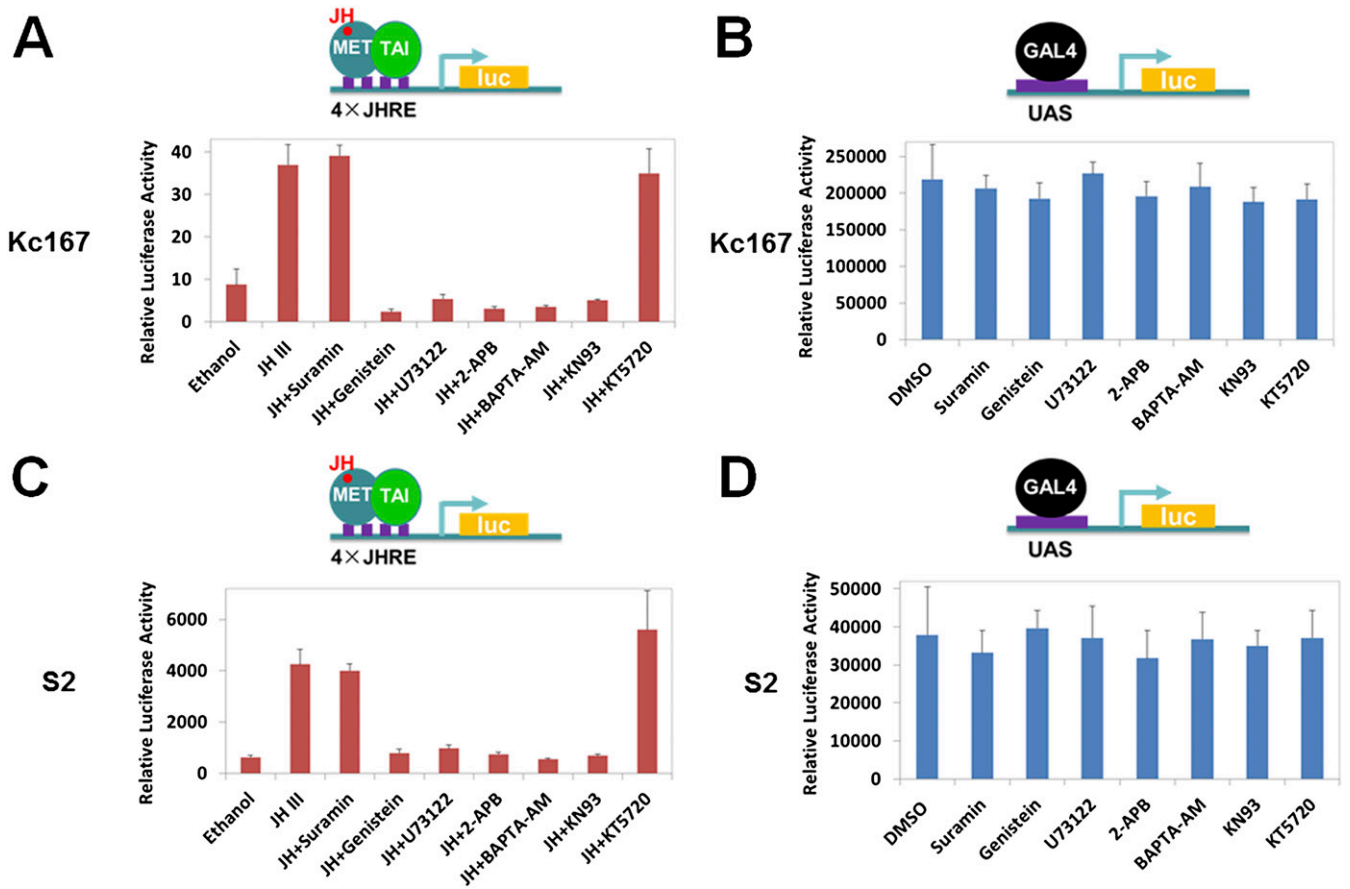

**Fig. S5.** The PLC/ $\text{Ca}^{2+}$ /CaMKII pathway modulates the MET/TAI-mediated gene expression in *Drosophila* cells. (A and C) Kc167 (A) and S2 (C) cells were transfected with expression plasmids for AaMET and AaTAI, together with a 4xJHRE-luc firefly luciferase reporter construct and a constitutively expressing Renilla luciferase construct. Transfected cells were incubated with indicated inhibitors for 1 h followed by treatment with 1  $\mu\text{M}$  JH-III for 4 h. Results are expressed as the ratio of firefly to Renilla luciferase activity. Results are the mean  $\pm$  SD of at least three independent experiments. (B and D) Kc167 (B) and S2 (D) cells were transfected with an expression vector for GAL4, together with a 4xUAS-luc firefly luciferase reporter construct and a constitutively expressing Renilla luciferase construct. Transfected cells were treated with the indicated inhibitor and JH-III as described for A and C.

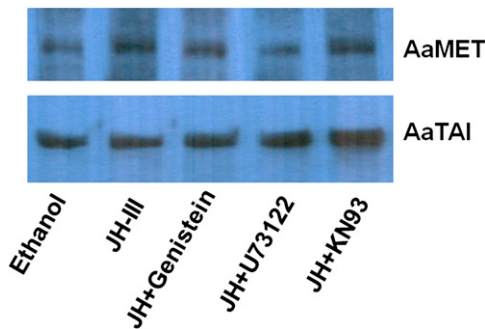

**Fig. S6.** The protein levels of AaMET and AaTAI are not affected by the PLC pathway. Abdomens from newly emerged mosquitoes were cultured in vitro with Genistein, U73122, or KN93 for 1 h. After 1  $\mu\text{M}$  JH-III was added to the medium, the culture continued for additional 3 h. The amounts of AaMET and AaTAI in the cultured fat bodies were analyzed by Western blot.

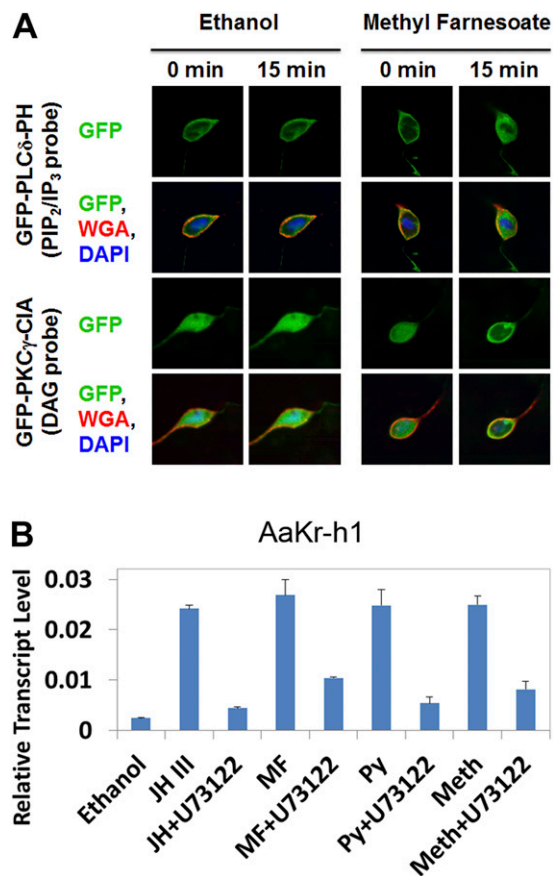

**Fig. S7.** MF regulates the expression of JH target genes via the PLC pathway. (A) MF stimulates the PLC-mediated hydrolysis of PIP<sub>2</sub>. Aag2 cells were transfected with plasmids encoding GFP-PLC $\delta$ -PH or GFP-PKC $\gamma$ -C1A and were stained with DAPI (blue) and WGA (red). The PLC $\delta$  PH domain binds to PIP<sub>2</sub> and IP<sub>3</sub> with high affinity. The PKC $\gamma$  C1A domain has a high affinity for DAG. Subcellular translocation of the GFP reporters after treatment with 1  $\mu$ M MF was captured using a confocal microscope at 1,000 $\times$  magnification. Representative images are shown. (B) Fat bodies from newly emerged mosquitoes were cultured in vitro with the PLC inhibitor U73122 (1  $\mu$ M) for 1 h. Then JH-III, MF, pyriproxyfen (Py), or methoprene (Meth) was added to the culture medium to a final concentration of 1  $\mu$ M, and the fat bodies were cultured for another hour and collected for RNA extraction. Expression of *AaKr-h1* was analyzed by real-time PCR. Results are the mean  $\pm$  SD of three independent experiments.

**Table S1. Isoforms of phospholipase C and calcium/calmodulin-dependent protein kinases**

| Gene          | Accession number | Description                                                       |
|---------------|------------------|-------------------------------------------------------------------|
| <i>PLC1</i>   | AAEL004431       | <i>Ae. aegypti</i> phospholipase C $\gamma$                       |
| <i>PLC2</i>   | AAEL008246       | <i>Ae. aegypti</i> phospholipase C $\epsilon$                     |
| <i>PLC3</i>   | AAEL009380       | <i>Ae. aegypti</i> phospholipase C $\beta$                        |
| <i>PLC4</i>   | AAEL017393       | <i>Ae. aegypti</i> phospholipase C, PH-PLC $\beta$ domain         |
| <i>PLC5</i>   | AAEL010124       | <i>Ae. aegypti</i> phospholipase C, PI-PLC $\gamma$ domain        |
| <i>CaMKI</i>  | AAEL011441       | <i>Ae. aegypti</i> calcium/calmodulin-dependent protein kinase I  |
| <i>CaMKII</i> | AAEL013824       | <i>Ae. aegypti</i> calcium/calmodulin-dependent protein kinase II |

**Table S2. Primers used in ChIP, qRT-PCR, and RNAi assays**

| Assay    | Primer                                       | Forward sequence (5'–3')                     | Reverse sequence (5'–3')                      |                                               |
|----------|----------------------------------------------|----------------------------------------------|-----------------------------------------------|-----------------------------------------------|
| ChIP     | Kr-h1-Pro                                    | TTCCGCGGCCAGTCCCTCGACAAA                     | CTCTCTGCTGCTGCTGCTCACTGA                      |                                               |
|          | Kr-h1-CDS                                    | TTCTGGAATGTGGATTGTTGA                        | CCTTTGCTTTTCGTTCACTCA                         |                                               |
| RT-PCR   | ET-Pro                                       | GTTTTGAAATTACCCATCCCACACG                    | GTCCATTCCATATGATGCGGATTCTT                    |                                               |
|          | ET-CDS                                       | GTAAGGATTCTTGCCAGGGAGACTC                    | ATCCATTGGCGAACAGTGGACAC                       |                                               |
|          | Kr-h1                                        | TTCTCGCAACAACAGCAACATCCG                     | TCATCAGATCCATTGACGCTGGGT                      |                                               |
|          | ET                                           | AATACAGATCCCTGCGGCCATA                       | CCTCACCCGCGAGTATAATGG                         |                                               |
|          | AAEL002576                                   | CTCGTGGGAATGGGCATCTT                         | AAGTAACCGTTGCGAGGGAG                          |                                               |
|          | AAEL002619                                   | AGCCCCAACTTGTGTGTAGG                         | CTTCTGGGTGTGGTGGTCTC                          |                                               |
|          | PLC1                                         | AGCTCGGTTTCGACGACTTT                         | TTCCGAGCGGATCGTTTTGT                          |                                               |
|          | PLC2                                         | CCACGCTCTCAACTGGTTTG                         | TTGCGGTGGGACACACTATG                          |                                               |
|          | PLC3                                         | GCCAAGGAACGATCGGACAA                         | TCTGCTGCTTCTGCACTCCCG                         |                                               |
|          | PLC4                                         | CGAGCCGAACAAGTTCAACG                         | AGTGTGACAGCGGTTGATCC                          |                                               |
|          | PLC5                                         | CCAAAGAGACTGAAGCGGGT                         | CACGTGACAACTGGTGCTTG                          |                                               |
|          | CaMKI                                        | GGAACAGGAGCGTTTTTCGGA                        | ATCGCTTCAGCACACGGATT                          |                                               |
|          | CaMKII                                       | GCGGCCAAGATCATCAACAC                         | CGGTACCAGATCGAACACT                           |                                               |
|          | GFP                                          | TAATACGACTCACTATAGGGGCTGTTAAAAGTGGATGATGATAC | TAATACGACTCACTATAGGGAATCGGCACCTTGGTAGAACGATC  |                                               |
|          | RpS7                                         | TCAGTGTACAAGAAGCTGACCCGA                     | TTCCGCGCGGCTCACTTATTAGATT                     |                                               |
|          | RNAi                                         | dsPLC1                                       | TAATACGACTCACTATAGGGAGAAGCTCATGACATCGCCAA     | TAATACGACTCACTATAGGGAGCTCCGGGAGCTTCTTGTGTT    |
|          |                                              | dsPLC2                                       | TAATACGACTCACTATAGGGAGTCAGCGACGATGAATACGAGGAT | TAATACGACTCACTATAGGGAGCGATGAACATTGGTAACAGGGAT |
|          |                                              | dsPLC3                                       | TAATACGACTCACTATAGGGAGAACTGGACAGCGTCAAGAAGAA  | TAATACGACTCACTATAGGGAGCACCGTTTCAAGCGTTACAATC  |
|          |                                              | dsPLC4                                       | TAATACGACTCACTATAGGGAGACTTAATGTCCGAGGATAACCCA | TAATACGACTCACTATAGGGAGGGTCTGGTGGAGATGATTGTT   |
| dsPLC5   |                                              | TAATACGACTCACTATAGGGAGAAACAGGCTACCACGTTGCTGA | TAATACGACTCACTATAGGGAGAGAACGCTTATCCAACCTCACTC |                                               |
| dsCaMKI  |                                              | TAATACGACTCACTATAGGGAGCGGGTCAGGCATTGTGTTAA   | TAATACGACTCACTATAGGGAGACTGCTTTGCCGTATGGCTTTT  |                                               |
| dsCaMKII |                                              | TAATACGACTCACTATAGGGAGCAACATCCGAACATTGTCAGGC | TAATACGACTCACTATAGGGAGCTGGTGGCGAGCATCGTAGTGA  |                                               |
| dsGFP    | TAATACGACTCACTATAGGGGCTGTTAAAAGTGGATGATGATAC | TAATACGACTCACTATAGGGAATCGGCACCTTGGTAGAACGATC |                                               |                                               |
